# Supplementary material
Source: Springer Nature journal article supplement (https://www.springermedizin.de/resource/supplementary/12914_2009_85_MOESM3_ESM.pdf/9537482)

a. Reporting of injury within 12 months, life experience of violence-related injury, pain complaints within 2 weeks preceding the survey by age group, n=4870

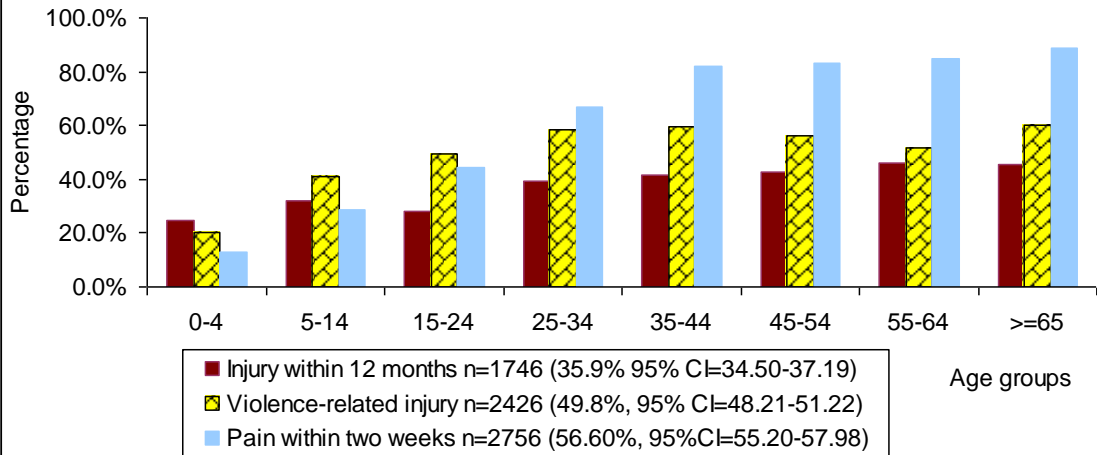

b. Pain complaints within 2 weeks preceding the survey by sex

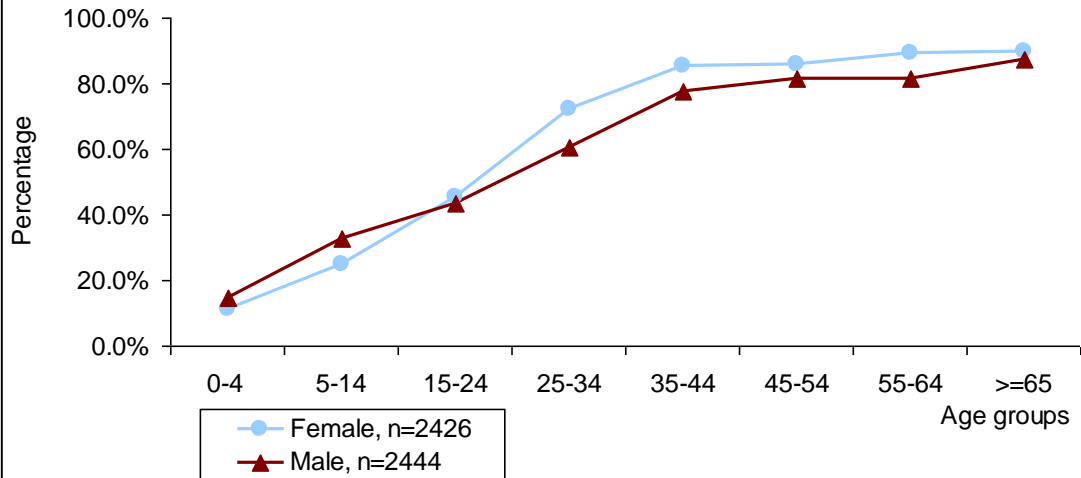

c. Pain complaints within 2 weeks preceding the survey by lifetime experience of violence-related injury

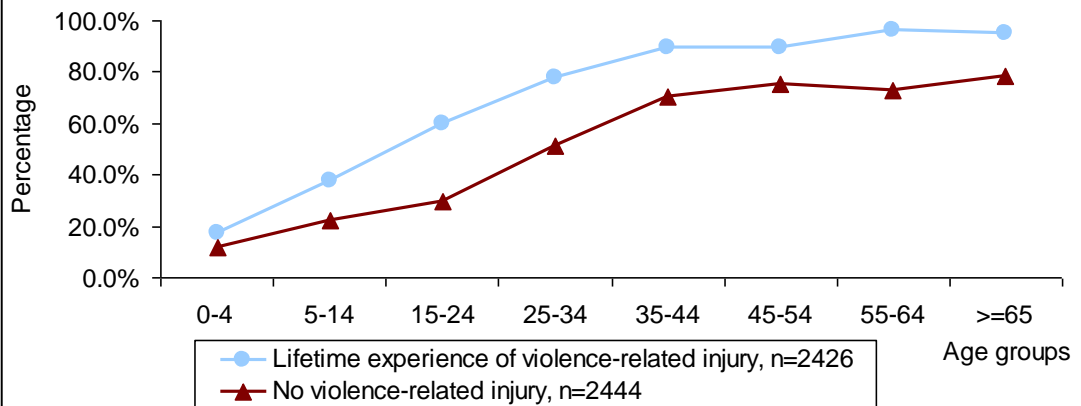

Supplement: MOESM3 [file 9537482]
